# Supplementary material for: Cell cycle oscillators underlying orderly proteolysis of E2F8
Source: PubMed Central journal article supplement — Mol Biol Cell. 2020 Apr 1;31(8):725–40. doi: 10.1091/mbc.E19-12-0725 (PMC7185961; doi:10.1091/mbc.e19-12-0725), 2020-04-01
Supplement: mbc-31-725-s001.pdf [file mbc-31-725-s001.pdf]

# Supplemental Materials

*Molecular Biology of the Cell*

Wasserman et al.

1  
2  
3  
4  
5  
6  
7  
8  
9  
10  
11  
12  
13  
14  
15  
16  
17  
18  
19  
20

**Supplementary Information**

**For**

Cell cycle oscillators underlying orderly proteolysis of E2F8

**Author list and affiliation:**

Danit Wasserman<sup>1</sup>; Sapir Nachum<sup>1</sup>; Meital Cohen<sup>1</sup>; Taylor P Enrico<sup>2</sup>; Meirav Noach-Hirsh<sup>1</sup>;  
Jasmin Parasol<sup>1</sup>, Sarit Zomer-Polak<sup>1</sup>; Naomi Auerbach<sup>1</sup> Evelin Sheinberger Chorni<sup>1</sup>; Hadas  
Nevenzal<sup>1</sup>; Nofar Levi-Dadon<sup>1</sup>; Xianxi Wang<sup>2</sup>; Roxane Lahmi<sup>1</sup>; Efrat Michaely<sup>1</sup>; Doron  
Gerber<sup>1</sup>; Michael J. Emanuele<sup>2</sup>; Amit Tzur<sup>1,3</sup>

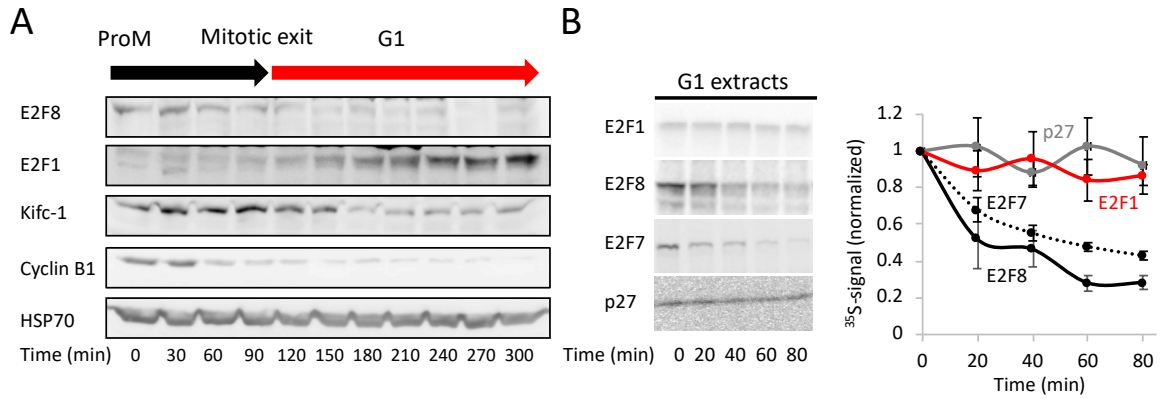

**Figure S1: E2F1 is stable in APC/C<sup>Cdh1</sup>-active G1 extracts.** (A) Western blot analyses of E2F1, E2F8, Cyclin B1, Kifc-1 (APC/C<sup>Cdh1</sup> targets) and HSP70 (loading control) in synchronous S3 cells released from a thymidine-nocodazole block into G1. Samples were harvested in 30 min intervals. (B) Time-dependent degradations of <sup>35</sup>S-labeled E2F1, E2F7, E2F8 and p27 (IVT products) in G1 extracts were assayed by SDS-PAGE and autoradiography. A set of source data and quantification of three experiments are shown (mean and SE values are plotted). In contrast to E2F8 and E2F7, E2F1 is stable in G1 extracts, like the SCF<sup>Skp2</sup> target p27 (negative control).

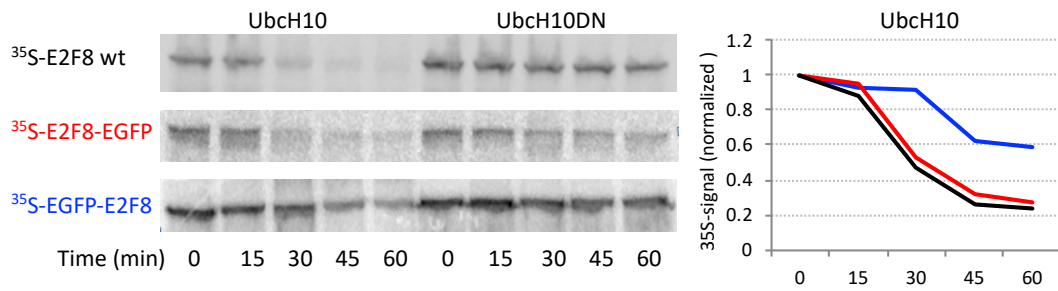

**Figure S2: Proteolysis of EGFP-tagged E2F8 in G1 extracts.** E2F8 was tagged with EGFP on either N- or C terminus. <sup>35</sup>S-labeled IVT product of tagged and untagged E2F8 were made, and their time-dependent degradations in G1 extracts were assayed by SDS-PAGE and autoradiography. Quantification of source data is plotted using matching colors.

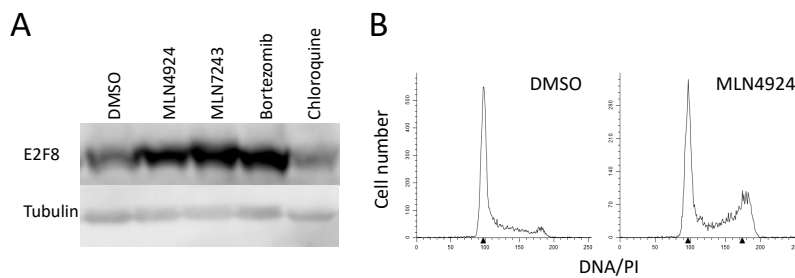

**Figure S3: E2F8 dynamics following proteolysis perturbations.** (A) HEK293 cells were treated with the depicted drugs for 5 h and harvested for Western blot analysis with anti-E2F8 and anti-Tubulin antibodies. Except for Chloroquine (100 μM), all drugs were used at a final concentration of 1 μM. (B) DNA distribution (PI staining) of HEK293 cells following 5 h treatment with DMSO and MLN4924.

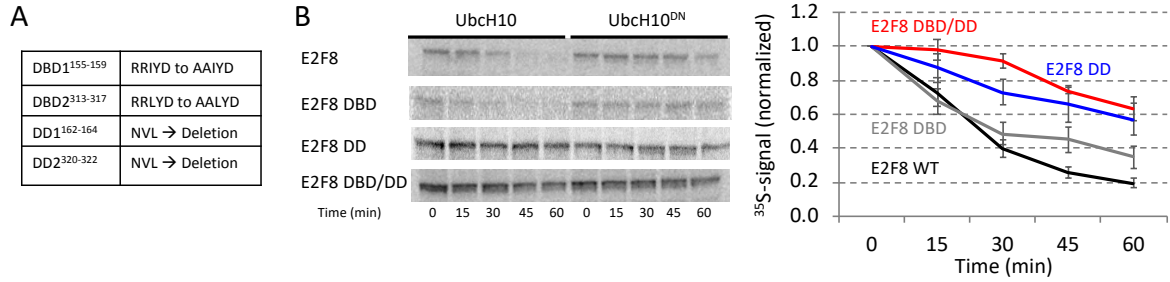

43  
44  
45  
46  
47  
48  
49  
50

**Figure S4. Degradation of E2F8 in G1 extracts is dependent on intact dimerization domains.** (A) E2F8 variants with mutated DNA-binding domains (DBD1/DBD2) or dimerization domains (DD1/DD2) or both, were generated using point mutations or deletion. (B) Degradation of <sup>35</sup>S-labeled E2F8 variants (IVT products) was tested in G1 extracts supplemented with WT or dominant negative Ubch10 (Ubch10<sup>DN</sup>). Time-dependent degradation was assayed by SDS-PAGE and autoradiography. Representative raw data and quantifications are shown. Mean E2F8 levels (<sup>35</sup>S signals) normalized to max signal at t = 0 are shown (n = 3-4). Bars represent SE. An unexpected, albeit profound, dependency of E2F8 proteolysis on intact dimerization domains, but not the adjacent DNA-binding domains, is evident.

51  
52  
53  
54  
55  
56  
57  
58  
59  
60  
61  
62  
63  
64  
65  
66  
67  
68

69 **Degradation of E2F8 in G1 extracts is dependent on intact dimerization domains**  
70 E2F8-EGFP, but not EGFP-E2F8, is degraded in G1 extracts in a manner similar to untagged  
71 E2F8 (**Fig. S2**). At some point during this study, we asked to complement our findings with *in*  
72 *vivo* quantification of fluorescently tagged E2F8 in live cells. Multiple attempts and  
73 strategies to generate stable cell lines with a constitutive (not inducible) expression of E2F8-  
74 EGFP failed. In addition, extensive efforts to knock in Venus (YFP) into an endogenous E2F8  
75 locus also failed. Reasoning that fluorescently tagged E2F8, all the more so when  
76 overexpressed, might be cytotoxic, and focusing on E2F8 dynamics rather than function, we  
77 generated E2F8 lacking DNA binding domains (DBD1/2) with the assumption that  
78 dysfunctional E2F8-EGFP might be inert *in vivo*. Because E2F8 functions as a homo/hetero-  
79 dimer, we also deleted its two dimerization domains (DD1/2) to minimize potential  
80 dominant-negative effect of the modified E2F8 in cells (**Fig. 5A and Fig. S4A**). Mutations  
81 were strategized based on the literature (Liu, Shats et al., 2013, Zalmas, Zhao et al., 2008).  
82 Conceptually, this experimental set up is valid only if the temporal proteolysis of the  
83 modified E2F8 variants is unchanged. To test that, we first assayed the proteolysis of the  
84 quadruple DBD/DD E2F8 mutant in G1 extracts. Surprisingly, this mutation nearly blocked  
85 E2F8 degradation (**Fig. S4B**). It was the DD mutations, rather than the DBD mutations, that  
86 contributed most to this molecular phenotype. In view of these results, we decided to  
87 abandon this line of research. The data, however, have implications on the structure-to-  
88 function relationship of E2F8 with relevance to past and future research of atypical E2Fs.  
89  
90  
91

## 92 Supplementary Tables

93

94

95

**Table 1: List of DNA oligos used for cloning and mutagenesis**

| No. | Plasmid                             | F/R* | Oligo sequence                                                       | Description                                                                                                                               |
|-----|-------------------------------------|------|----------------------------------------------------------------------|-------------------------------------------------------------------------------------------------------------------------------------------|
| 1   | pcDNA4/TO-Cyclin B1-DM              | F    | GACTGGATCCATGGCGCTCCGAGTACCAG                                        | For cloning a D-box mutant full-length human Cyclin B1 into a Tet-induced vector.                                                         |
| 2   |                                     | R    | GACTCTCGAGTTACACCTTTGCCACAGCCTT                                      |                                                                                                                                           |
| 3   | pCS2-FA-E2F8-EGFP                   | F    | GCATGGCCGGCCACCACCATGGAGAACGAAAA GGAAA                               | For C-terminal tagging E2F8 with EGFP in pCS2-FA vector.                                                                                  |
| 4   |                                     | R    | GCATACCGGTGTATGGACATCCTCTGTTGAG                                      |                                                                                                                                           |
| 5   | pCS2-His-E2F8-N80-EGFP              | F    | GCATGGCCGGCCACCACCATGGAGAACGAAAA GGAAA                               | For cloning the ORF of E2F8 N-terminus (amino acids 1-80) in frame with His (N-terminal) and EGFP (C-terminal) tags in pCS2-FA vector.    |
| 6   |                                     | R    | GCATACCGGTGGATCCCATTTCTGATCTCTGT TGC GGATC                           |                                                                                                                                           |
| 7   | pCS2-His-E2F8-C-EGFP                | F    | GCATGGCCGGCCACCACCATGCTCGAGGACAGT GGTTCC                             | For cloning the ORF of E2F8 C-terminus (amino acids 607-867) in frame with His (N-terminal) and EGFP (C-terminal) tags in pCS2-FA vector. |
| 8   |                                     | R    | ATGCACCGGTGGATCCCAATGGACATCCTCT GTTGAGA                              |                                                                                                                                           |
| 9   | pCS2-p27                            | F    | ATATGGCCGGCCACCACCATGTCAAACG                                         | For cloning ORF of p27 into pCS2-FA vector.                                                                                               |
| 10  |                                     | R    | GCATGGCCGGCCTTACGTTTGACGTCT                                          |                                                                                                                                           |
| 11  | pcDNA-E2F1                          | F    | ATATGGTACCATGGCCTTGGCCGGGGCCCC                                       | For cloning ORF of E2F1 into pcDNA3.1(+) vector.                                                                                          |
| 12  |                                     | R    | GCGCGAATTCTCAGAAATCCAGGGGGGTGA                                       |                                                                                                                                           |
| 13  | pCS2-FA-His-E2F8-HA                 | F    | GCATGGCCGGCCACCACCATGGAGAACGAAAA GGAAA                               | For tagging E2F8 with C-terminal HA and cloning this PCR product into a pCS2-FA-His vector.                                               |
| 14  |                                     | R    | ATGCGGCGCGCCTTAAGCGTAATCTGGAACA TCGTATGGGTACATATGGACATCCTCTGTTGA GAC |                                                                                                                                           |
| 15  | pCS2-FA-E2F8 pCS2-His-E2F8-N80-EGFP | F    | AGCCACATAAAAAGGGGACTAATGAAAGCACC TCTGAAAGAA                          | E2F8 mutagenesis: for substituting Thr 20 with Ala. Phosphorylation site mutation.                                                        |
| 16  |                                     | R    | TTCTTTCAGAGGTGCTTTCATTAGTCCCCTTTT ATGTGGCT                           |                                                                                                                                           |
| 17  | pCS2-FA-E2F8 pCS2-His-E2F8-N80-EGFP | F    | CTTTGGCCCTTTAACC GCACCTACCAAGCCCA A                                  | E2F8 mutagenesis: for substituting Thr 44 with Ala. Phosphorylation site mutation.                                                        |
| 18  |                                     | R    | TTGGGCTTGGTAGGTGCGGTTAAAGGGCCAA AG                                   |                                                                                                                                           |
| 19  | pCS2-FA-E2F8 pCS2-His-E2F8-N80-EGFP | F    | TGTGAGCCACATAAAAAGGGGACTAATGAAAGATC CTCTGAAAGAATCCACC                | E2F8 mutagenesis: for substituting Thr 20 with Asp. Phosphorylation site mutation.                                                        |
| 20  |                                     | R    | GGTGGATTCTTTCAGAGGATCTTTCATTAGTCCCCT TTTATGTGGCTCACA                 |                                                                                                                                           |
| 21  | pCS2-FA-E2F8 pCS2-His-E2F8-N80-EGFP | F    | CTGACTTTGGCCCTTTAACC GATCCTACCAAGCCCA AGGAAGG                        | E2F8 mutagenesis: for substituting Thr 44 with Asp. Phosphorylation site mutation.                                                        |
| 22  |                                     | R    | CCTTCCTTGGGCTTGGTAGGATCGGTTAAAGGGCC AAAGTCAG                         |                                                                                                                                           |
| 23  | pCS2-FA-E2F8 pCS2-FA-His-E2F8-HA    | F    | GAAAAGGAAAATCTCTTTTGTGAGCCACATAAAGC GGGACTAATGAAAACAC                | E2F8 mutagenesis: for substituting Arg 15 with Ala. RxL site mutation.                                                                    |
| 24  |                                     | R    | GTGTTTTTCATTAGTCCCGCTTTATGTGGCTCACAAA AGAGATTTTCTTTTC                |                                                                                                                                           |
| 25  | pCS2-FA-E2F8 pCS2-FA-His-E2F8-HA    | F    | GAGATCCGCAACAGAGATCAGAAAGCGGGTTTGT TTGACAA                           | E2F8 mutagenesis: for substituting Arg 81 with Ala. RxL site mutation.                                                                    |
| 26  |                                     | R    | TTGTCAAACAAACCCGCTTCTGATCTCTGTTGCGG ATCTC                            |                                                                                                                                           |
| 27  | pCS2-FA-E2F8 pCS2-FA-His-E2F8-HA    | F    | TGGAAGATTGGATAAAAGCAAGTTTAAACAAAA ATTGCGAGGTTGTATGATATAGCTA          | E2F8 mutagenesis: for substituting Arg 313 with Ala. RxL site mutation.                                                                   |
| 28  |                                     | R    | TAGCTATATCATAAACCTCGCAATTTTGTTTTAA ACTTGCTTTTATCCAAATCTTCCA          |                                                                                                                                           |
| 29  | pCS2-FA-E2F8 pCS2-FA-His-E2F8-HA    | F    | AACTCTCTTTGTCCACAGGCAAACTGGAAGTCT CAACA                              | E2F8 mutagenesis: for substituting Arg 857 with Ala. RxL site mutation.                                                                   |
| 30  |                                     | R    | TGTTGAGACTCCAGTTTTGCCTGTGGGACAAAAGA GAGTT                            |                                                                                                                                           |

96

|    |                                        |   |                                                                              |                                                                                                    |
|----|----------------------------------------|---|------------------------------------------------------------------------------|----------------------------------------------------------------------------------------------------|
| 31 | pCS2-FA-E2F8<br>pCS2-His-E2F8-N80-EGFP | F | GGCCACCATGGAGAACGAAGCGCAAATCTCTTT<br>TGTGAGCCAC                              | E2F8 mutagenesis: for substituting<br>Lys 5 and Glu 5 with Ala. KEN site<br>mutation.              |
| 32 |                                        | R | GTGGCTCACAAAAGAGATTTGCCGCTTCGTTCTCCA<br>TGGTGGGCC                            |                                                                                                    |
| 33 | pCS2-FA-E2F8                           | F | GGAGGTGAGACGGTCTTCAGCAGCGAACTGTGCCA<br>AAAACCTC                              | E2F8 mutagenesis: for substituting<br>Lys 375 and Glu 376 with Ala. KEN<br>site mutation.          |
| 34 |                                        | R | GAGGTTTTTGGCAGATTCGCTGCTGAAGACCGTCT<br>CACCTCC                               |                                                                                                    |
| 35 | pCS2-FA-E2F8<br>pCS2-His-E2F8-C-EGFP   | F | GCAGAGTCCATTTTGTCTGGTGCAGCAAACCTCAAGT<br>GCT CTTTCCCC                        | E2F8 mutagenesis: for substituting<br>Lys 657 and Glu 658 with Ala. KEN<br>site mutation.          |
| 36 |                                        | R | GGGGAAAGAGCACTTGAGTTTGCTGCACCAGACAA<br>AATGGAC TCTGC                         |                                                                                                    |
| 37 | pCS2-FA-E2F8                           | F | GGGTTTGTGGACAACGAAGTGGAGTACCTGAGG<br>CCA AAGA                                | E2F8 mutagenesis: for substituting<br>Arg 87 and Leu 90 with Gly and Val.<br>RXXL site mutation.   |
| 38 |                                        | R | TCTTTGGCCTCAGGTA <del>CT</del> CACCTTC <del>CG</del> TTGTCAAACA<br>AACCC     |                                                                                                    |
| 39 | pCS2-FA-E2F8                           | F | TACACTGGCACGGGGGACACAATGTCAACAAAAC<br>CCT TG                                 | E2F8 mutagenesis: for substituting<br>Arg 183 and Leu 186 with Gly and<br>Val. RXXL site mutation. |
| 40 |                                        | R | CAAGGGTTTTGTGA <del>ATT</del> GTGTCC <del>CC</del> CGTCCAAG<br>TGTA          |                                                                                                    |
| 41 | pCS2-FA-E2F8                           | F | GACGCATTTACGATATCGTGGAGAGTTTACATATGG<br>TGAG                                 | E2F8 mutagenesis: Deletion of NVL<br>162. Dimerization domain mutation.                            |
| 42 |                                        | R | CTCACCATATG <del>TAA</del> ACTCTCCACGATATCGTAAATG<br>CGTC                    |                                                                                                    |
| 43 | pCS2-FA-E2F8                           | F | AACAAAAATTAGGAGTTGTATGATATAGCTAGTA<br>GCCT GGATCTTAT                         | E2F8 mutagenesis: Deletion of NVL<br>320. Dimerization domain mutation.                            |
| 44 |                                        | R | ATAAGATCCAGGCTACTAGCTATATCATAAACCTC<br>CTAATTT TTGTT                         |                                                                                                    |
| 45 | pCS2-FA-E2F8                           | F | CAGAGGAACCTAATGTTGAACGTGCAGCCATTAC<br>GAT ATCGTGAACGTCC                      | E2F8 mutagenesis: for substituting<br>Arg 155 and 156 with Ala. DNA-<br>binding domain mutation.   |
| 46 |                                        | R | GGACGTTACGATATCGTAAATGGCTGCACGTTCAA<br>CATTAA GTTCCTCTG                      |                                                                                                    |
| 47 | pCS2-FA-E2F8                           | F | CCATGTGGAAGATTTGGATAAAAGCAAGTTTAAAA<br>CAAAAATTGCGCGGTTGTATGA TATAGCTAATGTTT | E2F8 mutagenesis: for substituting<br>Arg 313 and 314 with Ala. DNA-<br>binding domain mutation.   |
| 48 |                                        | R | GAACATTAGCTATATCATAACAACGCCCAATTTTTG<br>TTTTAAA CTTGCTTTTATCCAATCTTCC ACATGG |                                                                                                    |

97

\* Primer orientation; forward (F) or Reverse complement (R)

98

99
